# Supplementary material for: Mid-latitude neutral wind responses to sub-auroral polarization streams
Source: Copernicus journal article supplement (doi:10.5194/angeo-40-571-2022), 2022-09-28
Supplement: Supplementary file 1 [file angeo-40-571-2022-supplement.zip]

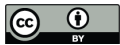

## *Supplement of*

# **Mid-latitude neutral wind responses to sub-auroral polarization streams**

**Daniel D. Billett et al.**

*Correspondence to:* Daniel D. Billett ([daniel.billett@usask.ca](mailto:daniel.billett@usask.ca))

- [angeo-40-571-2022-supplement-title-page.pdf](#)
- [S1\\_nation.mp4](#)

The copyright of individual parts of the supplement might differ from the article licence.
